# Supplementary material
Source: PubMed Central journal article supplement (PMC6902859)

**Figure S1:** Synergistic cytotoxic effects of combination of eeyarestatin with sunitinib in MZCRC1 cells. MZCRC1 cells were treated with eeyarestatin (4μM), vandetanib (4μM) and the combination of eeyarestatin and vandetanib for 24 h. Cleaved caspase 3–positive and cleaved PARP–positive cells were quantified using flow cytometry. Representative images were presented.

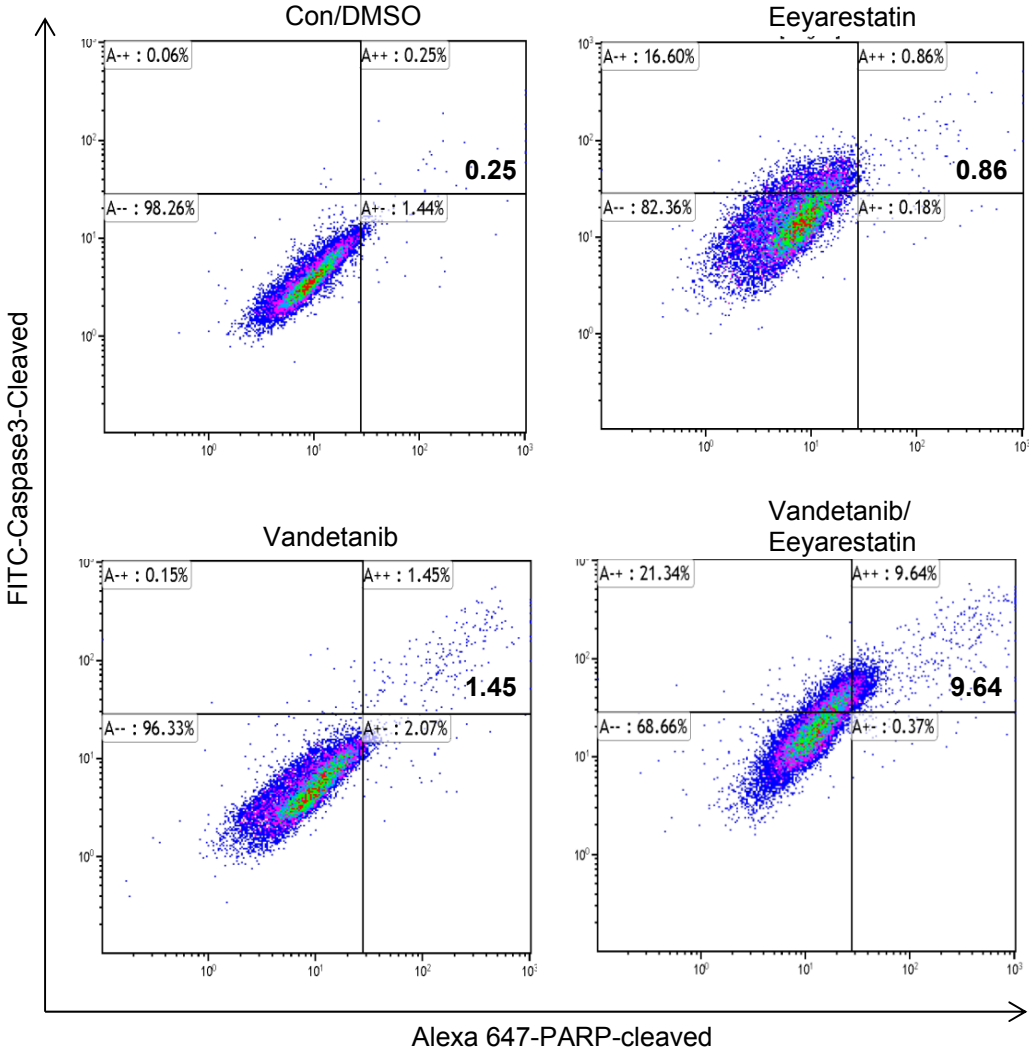

Supplement: NIHMS1516484-supplement-1.pdf [file NIHMS1516484-supplement-1.pdf]
