# Supplementary material
Source: PubMed Central journal article supplement (PMC6902859)

**Figure S2.** Eeyarestatin in combination with sunitinib synergistically induce cell death in MZCRC1 spheres. MZCRC1 spheres were formed in serum free media DMEM/F12, supplemented with B27 serum supplement, basic FGF, and EGF (20ng/ml) onto uncoated tissue culture plates for a week and were treated with eeyarestatin alone (2 $\mu$ M), sunitinib 2 $\mu$ M alone and their combination for 48 hours. Representative images and corresponding statistical plots were presented. Values represent average count in 10 fields under 10 magnification and are presented as the mean  $\pm$  SD.

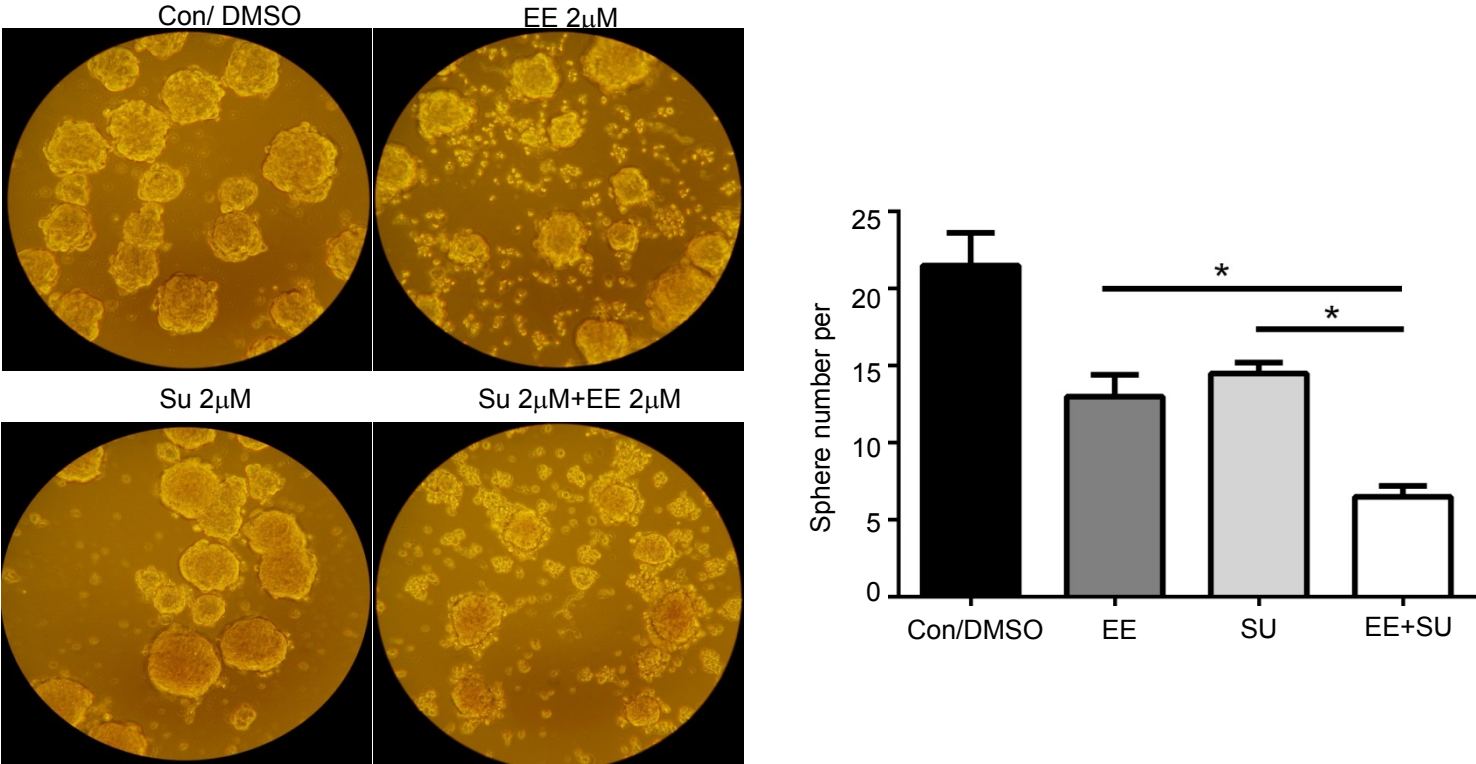

Supplement: NIHMS1516484-supplement-2.pdf [file NIHMS1516484-supplement-2.pdf]
