# Supplementary material
Source: PubMed Central journal article supplement (PMC6902859)

**Figure S4.** ChIP -seq profiles of ATF4 target genes (DDIT3, MKNK2, LZTFL1, SIAH1) and H3K9Ac in MZCRC1 cells treated with eeyarestatin. The peaks represent sequences bound by ATF4 and H3K9Ac. Arrows indicate the direction of transcription.

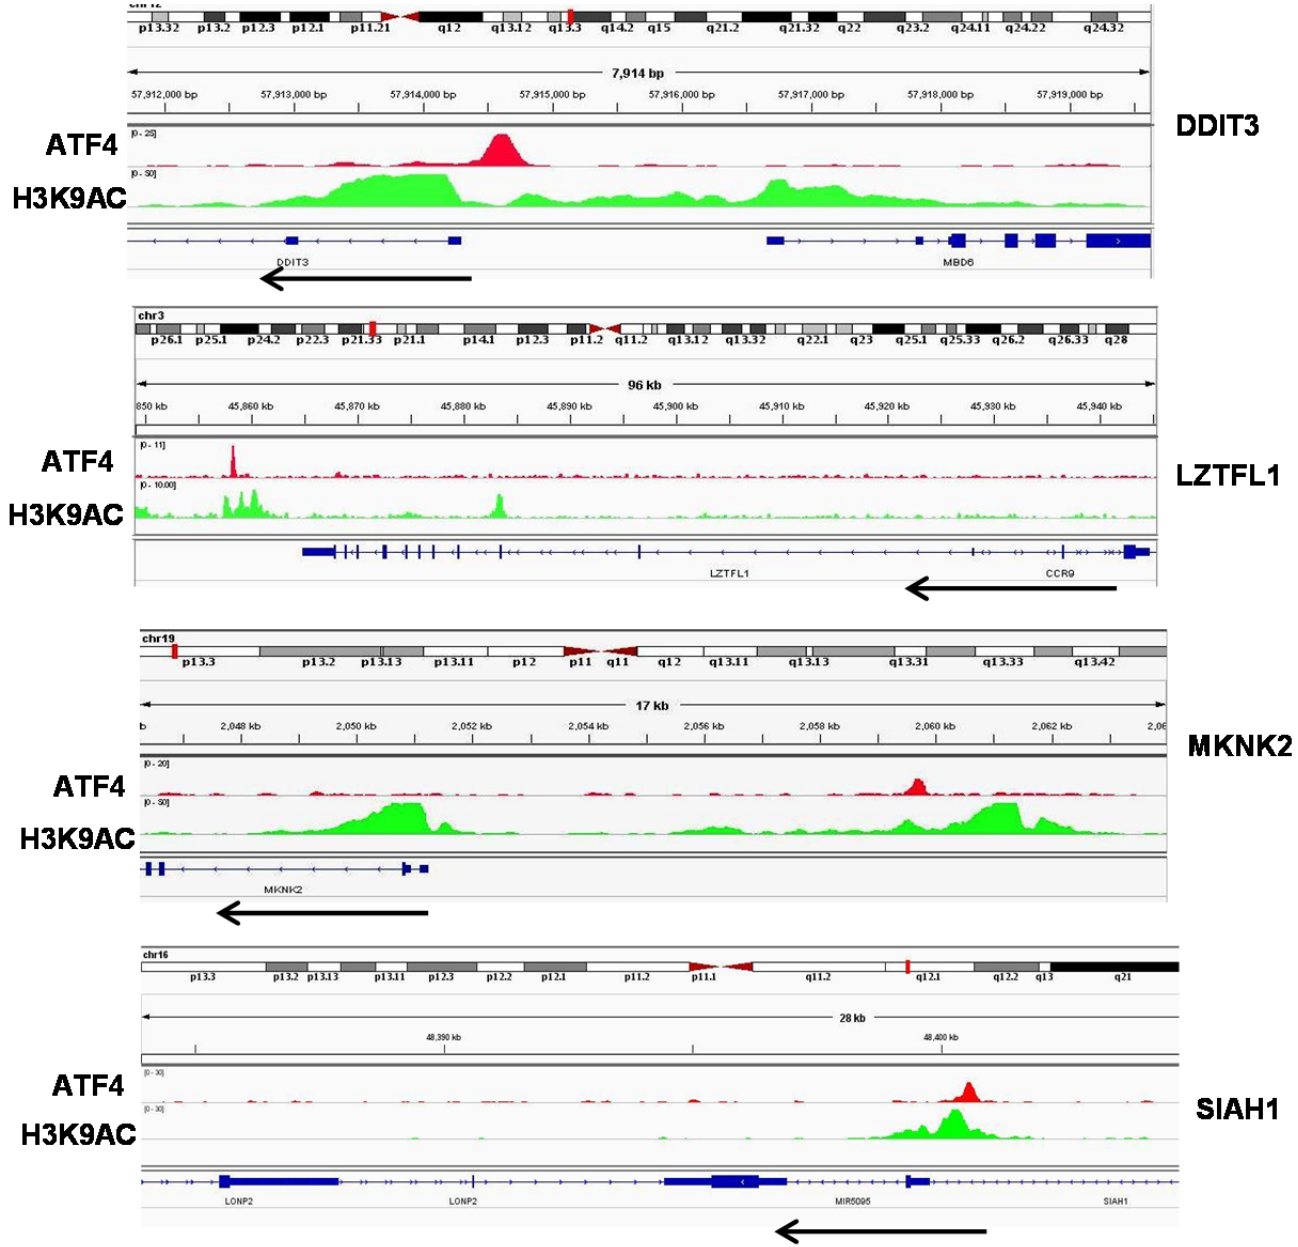

Supplement: NIHMS1516484-supplement-4.pdf [file NIHMS1516484-supplement-4.pdf]
