# Supplementary material
Source: PubMed Central journal article supplement (PMC6902859)
Supplement: NIHMS1516484-supplement-5.pdf [file NIHMS1516484-supplement-5.pdf]

**Table S1:** CI analysis of sunitinib (SU) or vandetanib (Van) combined with eeyarestatin in TT cells. Analysis was conducted using the CampuSyn software (CacuSyn, Inc.). Descriptions are based on CI values and the recommendations of CalcusynSyn: <0.1, very strong synergism; 0.1–0.3, strong synergism; 0.3–0.7, synergism; 0.7–0.85, moderate synergism; 0.85–0.9, slight synergism; >1 antagonism. Abbreviation: Fa, fraction affected as tested by MTT assay after 48 hours with each indicated treatment.

| <b>EE</b> | <b>SU</b> | <b>Effect</b> | <b>CI</b> | <b>Description</b> |
|-----------|-----------|---------------|-----------|--------------------|
| 0.1       | 0.01      | 0.06          | 0.71      | Moderate Synergism |
| 0.1       | 0.1       | 0.25          | 0.13      | Strong Synergism   |
| 0.1       | 1.0       | 0.28          | 0.79      | Moderate Synergism |
| 1.0       | 0.01      | 0.13          | 0.49      | Synergism          |
| 1.0       | 0.1       | 0.3           | 0.23      | Strong Synergism   |
| 1.0       | 1.0       | 0.36          | 0.45      | Synergism          |
| 2.0       | 0.01      | 0.21          | 0.53      | Synergism          |
| 2.0       | 0.1       | 0.38          | 0.28      | Strong Synergism   |
| 2.0       | 1.0       | 0.4           | 0.45      | Synergism          |
| 4.0       | 0.01      | 0.42          | 0.44      | Synergism          |
| 4.0       | 0.1       | 0.5           | 0.35      | Synergism          |
| 4.0       | 1.0       | 0.7           | 0.18      | Strong Synergism   |
| 6.0       | 0.01      | 0.63          | 0.33      | Synergism          |
| 6.0       | 0.1       | 0.77          | 0.19      | Strong Synergism   |
| 6.0       | 1.0       | 0.85          | 0.12      | Strong Synergism   |

| <b>EE</b> | <b>Van</b> | <b>Effect</b> | <b>CI</b> | <b>Description</b>    |
|-----------|------------|---------------|-----------|-----------------------|
| 0.1       | 0.01       | 0.17          | 0.06      | Very Strong Synergism |
| 0.1       | 0.1        | 0.27          | 0.16      | Strong Synergism      |
| 0.1       | 1.0        | 0.47          | 0.43      | Synergism             |
| 1.0       | 0.01       | 0.28          | 0.2       | Strong Synergism      |
| 1.0       | 0.1        | 0.42          | 0.16      | Strong Synergism      |
| 1.0       | 1.0        | 0.59          | 0.27      | Strong Synergism      |
| 2.0       | 0.01       | 0.5           | 0.17      | Strong Synergism      |
| 2.0       | 0.1        | 0.63          | 0.12      | Strong Synergism      |
| 2.0       | 1.0        | 0.68          | 0.21      | Strong Synergism      |
| 4.0       | 0.01       | 0.88          | 0.06      | Very Strong Synergism |
| 4.0       | 0.1        | 0.92          | 0.04      | Very Strong Synergism |
| 4.0       | 1.0        | 0.93          | 0.049     | Very Strong Synergism |
