# Supplementary material
Source: PubMed Central journal article supplement (PMC6902859)
Supplement: NIHMS1516484-supplement-6.pdf [file NIHMS1516484-supplement-6.pdf]

**Table S2:** Functional categories of ATF4 target genes.

| <b>Response to ER stress</b> | <b>Apoptosis</b> | <b>Transcription</b> | <b>Oxidative stress</b> |
|------------------------------|------------------|----------------------|-------------------------|
| <i>CHAC1</i>                 | <i>BBC3</i>      | <i>CBX4</i>          | <i>KLF9</i>             |
| <i>DDIT3</i>                 | <i>NOXA</i>      | <i>CEBPB</i>         | <i>SESN2</i>            |
| <i>TRIB3</i>                 | <i>MAP2K1</i>    | <i>APC2</i>          | <i>MAP2K1</i>           |
| <i>HSPA5</i>                 | <i>DDIT3</i>     | <i>ATF3</i>          | <i>FHT1</i>             |
| <i>PPP1R15A</i>              | <i>UBC</i>       | <i>ATF6</i>          |                         |
| <i>HERPUD1</i>               | <i>RAD21</i>     | <i>BACH2</i>         |                         |
| <i>SEL1L</i>                 | <i>SIAH1</i>     | <i>BARX1</i>         |                         |
| <i>SREBF1</i>                | <i>PIK3C2B</i>   | <i>BRCA1</i>         |                         |
| <i>ATF6</i>                  | <i>DDIT4</i>     | <i>BTF3L4</i>        |                         |
| <i>NFE2L2</i>                | <i>JDP2</i>      | <i>CARM1</i>         |                         |
| <i>CEBPG</i>                 | <i>TRIB3</i>     | <i>CBX4</i>          |                         |
|                              | <i>MLNK2</i>     | <i>CREB3L4</i>       |                         |
|                              | <i>CHAC1</i>     | <i>CREG1</i>         |                         |
|                              | <i>DUSP12</i>    | <i>CTBP2</i>         |                         |
|                              | <i>ATF3</i>      | <i>FANK1</i>         |                         |
|                              | <i>ATF6</i>      | <i>GLI1</i>          |                         |
|                              | <i>FGF21</i>     | <i>HNRNPA3</i>       |                         |
|                              | <i>EIF4EBP1</i>  | <i>HOXB3</i>         |                         |
|                              |                  | <i>HOXB4</i>         |                         |
|                              |                  | <i>HOXB5</i>         |                         |
|                              |                  | <i>HOXB6</i>         |                         |
|                              |                  | <i>HOXB7</i>         |                         |
|                              |                  | <i>HOXB8</i>         |                         |
|                              |                  | <i>HOXB9</i>         |                         |
|                              |                  | <i>HOXB10</i>        |                         |
|                              |                  | <i>IRF2BP2</i>       |                         |
|                              |                  | <i>ISL2</i>          |                         |
|                              |                  | <i>JDP2</i>          |                         |
|                              |                  | <i>KLF9</i>          |                         |
|                              |                  | <i>LZTFL1</i>        |                         |
|                              |                  | <i>NFE2L2</i>        |                         |
|                              |                  | <i>NKX2-2</i>        |                         |
|                              |                  | <i>RBCK1</i>         |                         |
|                              |                  | <i>RREB1</i>         |                         |
|                              |                  | <i>SREBF1</i>        |                         |
|                              |                  | <i>TCF3</i>          |                         |
|                              |                  | <i>ZNF24</i>         |                         |
