# Supplementary material
Source: PubMed Central journal article supplement (PMC6902859)
Supplement: NIHMS1516484-supplement-7.pdf [file NIHMS1516484-supplement-7.pdf]

**Table S3:** Primers used for ChIP sequencing validation.

|                          |                                   |
|--------------------------|-----------------------------------|
| <b>Siah1-fw</b>          | <b>AGCTACAGCGTATCTGGGAAATG</b>    |
| <b>Siah1-RV</b>          | <b>CCGTTGAATGAATTAGGGAGAATG</b>   |
| <b>Klf9-pro-neg-fw</b>   | <b>TGCCTGGCCAAAGGTAACT</b>        |
| <b>Klf9-pro-neg-RV</b>   | <b>CTCCCATCTCAAAGCCCATTAC</b>     |
| <b>Klf9-enh-Fw</b>       | <b>TCTTGGATCGAATGTGCCTTT</b>      |
| <b>Klf9-enh-Rv</b>       | <b>CCCCTCGCAGGCTTAGC</b>          |
| <b>MKNK2-10k-Fw</b>      | <b>CACGCCTGTACACACTTGCAA</b>      |
| <b>MKNK2-10k-Rv</b>      | <b>CCTTGGGCCGTGGTTCT</b>          |
| <b>Con reg chr9-fw</b>   | <b>TCTTGCTTTCCTGACCTCATGA</b>     |
| <b>Con reg-chr9-Rv</b>   | <b>GATCCGACAATAGGTCTAAGGATTTC</b> |
| <b>LZTFL1-6kb utr-fw</b> | <b>TGCATTCTGCAGGTCTATTCTGA</b>    |
| <b>LZTFL1-6kb utr-rv</b> | <b>CTCCTCTTGCCTCCCTGTCTT</b>      |
| <b>DDIT3-Fw</b>          | <b>GCCTCTTTGCCGCTTGTCT</b>        |
| <b>DDIT3-RV</b>          | <b>AACGGCGGGTAAAGCTAGGT</b>       |
| <b>BBC3(+11kb)-fw</b>    | <b>GGCAGAAGGCGGAAGCA</b>          |
| <b>BBC3(+11kb)-RV</b>    | <b>GGTTTGTATTTGCAGGCTTCCT</b>     |
