# Supplementary material
Source: PubMed Central journal article supplement (PMC6902859)

**Figure S3.** Ingenuity Pathway Analysis of ATF4 target genes.

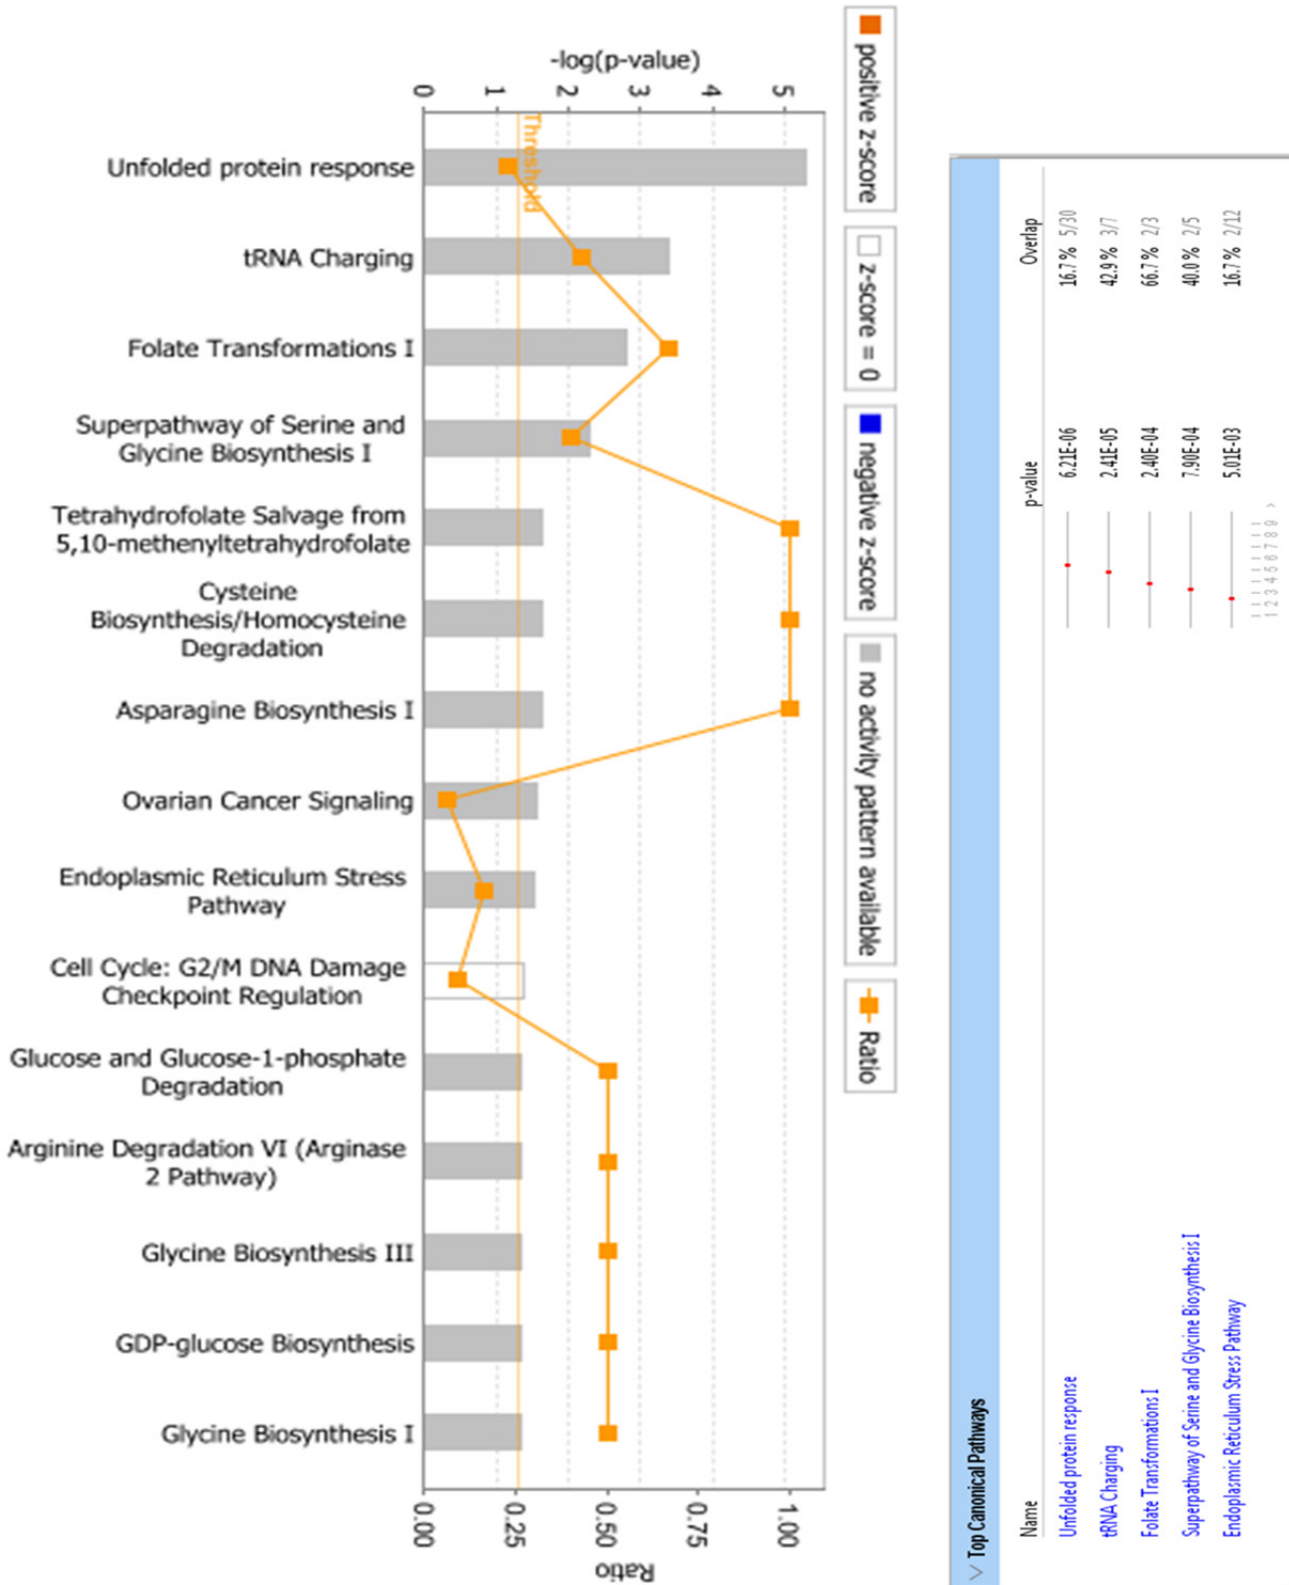

Supplement: NIHMS1516484-supplement-3.pdf [file NIHMS1516484-supplement-3.pdf]
